## Hepatitis B virus X protein induces expression of alpha-fetoprotein and activates PI3K/mTOR signaling pathway in liver cells

Mingyue Zhu<sup>1,2,\*</sup>, Junli Guo<sup>1,3,\*</sup>, Wei Li<sup>1,2</sup>, Yan Lu<sup>1,2</sup>, Shigan Fu<sup>1</sup>, Xieju Xie<sup>4</sup>, Hua Xia<sup>1,2</sup>, Xu Dong<sup>1,2</sup>, Yi Chen<sup>1,2</sup>, Ming Quan<sup>3</sup>, Shaojiang Zheng<sup>1,5</sup>, Keping Xie<sup>3</sup>, Mengsen Li<sup>1,2</sup>

<sup>1</sup>Hainan Provincial Key Laboratory of Carcinogenesis and Intervention, Hainan Medical College, Haikou, Hainan 571199, P. R. China

<sup>2</sup>Key Laboratory of Molecular Biology, Hainan Medical College, Haikou, Hainan 571199, P. R. China

<sup>3</sup>Department of Gastroenterology, Hepatology & Nutrition, The University of Texas MD Anderson Cancer Center, Houston, TX 77030, USA

<sup>4</sup>Department of Physiology and Pathophysiology, Hainan Medical College, Haikou, Hainan 571199, P. R. China

<sup>5</sup>Tumor Institute, Affiliated Hospital of Hainan Medical College, Haikou, Hainan 570102, P. R. China

\*These authors have contributed equally to this work

### Correspondence to:

Mengsen Li, e-mail: mengsenli@163.com

Keping Xie, e-mail: kepxie@mdanderson.org

**Keywords:** AFP, HBx, PI3K/mTOR signaling, Liver cells, Hepatocarcinogenesis

**Received:** October 10, 2014

**Accepted:** December 11, 2014

**Published:** January 21, 2015

### ABSTRACT

**The hepatitis B virus (HBV)-X protein (HBx) induces malignant transformation of liver cells, and elevated expression of alpha-fetoprotein (AFP) is a significant biomarker of hepatocarcinogenesis. However, the role of AFP in HBV-related hepatocarcinogenesis is unclear. In this study, we investigated the regulatory impact of AFP expression on HBx-mediated malignant transformation of human hepatocytes. We found that HBV induced the expression of AFP before that of oncogenes, e.g., Src, Ras and chemokine (C-X-C motif) receptor 4 (CXCR4), and AFP activated protein kinase B (AKT) and mammalian target of rapamycin (mTOR) in HBV-related HCC tissues and in human liver cells transfected with HBx. Cytoplasmic AFP interacted with and inhibited phosphatase and tensin homolog deleted on chromosome 10 (PTEN), activating the phosphatidylinositol 3-kinase (PI3K)/AKT signaling pathway and promoting mTOR-mediated stimulation of the transcription factor hypoxia inducible factor-1 $\alpha$  (HIF-1 $\alpha$ ), and therefore led to the activation of the promoters of Src, CXCR4, and Ras genes. On the contrary, reduced expression of AFP by siRNA resulted in the repression of p-mTOR, pAKT, Src, CXCR4, and Ras in human malignant liver cells. Taken together, for the first time our study indicates that HBx-induced AFP expression critically promote malignant transformation in liver cells through the activation of PI3K/mTOR signaling.**

### INTRODUCTION

Hepatocellular carcinoma (HCC) is the most common type of liver cancer and currently accounts for approximately 610,000 deaths annually worldwide [1]. Hepatitis B virus (HBV) infection is a major risk factor for HCC [2, 3]. However, HBV cannot directly drive the malignant transformation of liver cells [4, 5]. As a multifunctional transactivator protein [4], HBV x protein (HBx) plays a crucial role in HBV-associated HCC

development [6–8]. HBx is able to form a complex with the p53 tumor suppressor and inhibit its DNA binding and transcriptional activity [9, 10], thus activating the phosphatidylinositol 3-kinase (PI3K)/protein kinase B (AKT) signaling pathway and accelerating the transcription of oncogenes [11]. HBx promotes the proliferation and transformation of hepatocytes by hyperactivating oncogenic signals-including mitogen-activated protein kinase, PI3K, and wingless-related integration site [12–14]. HBx also prevents the apoptosis

of liver cells by inhibiting the activity of caspase-3 [15] via PI3K/AKT signaling. However, the precise mechanisms by which HBx promotes the signal transduction of many oncogenic pathways remain unclear.

Alpha-fetoprotein (AFP) is an important biomarker of HCC. It is a strong, independent predictor of long-term HCC risk in HBV patients [16]. Recently, functional studies have revealed that LIM-homeobox family-4 (LHX-4) suppresses hepatocarcinogenesis through reducing AFP expression [17], and we have found that AFP interacts with and inhibits the activity of phosphatase and tensin homolog deleted on chromosome 10 (PTEN), stimulating the transduction of the PI3K/AKT signaling pathway [18]. PI3K is recruited and activated during the intracellular signal transduction of many growth factor receptors and has been implicated in the signaling of survival factors [19, 20]. The PI3K/AKT pathway also has been implicated in the development of liver carcinogenesis [21]; its activation contributes to the upregulation of Ras, Src, chemokine (C-X-C motif) receptor 4 (CXCR4) [22–26], mammalian target of rapamycin (mTOR), and hypoxia inducible factor-1 $\alpha$  (HIF-1 $\alpha$ ) proteins [27–29]. We have recently confirmed that AFP promotes cancer cell proliferation [30], enhances *Ras* expression [31], and activates PI3K/AKT signals to enhance *Src* expression [32]. These observations suggest that the expression of AFP might be crucial in the malignant transformation of liver cells.

HBx overcomes p53-mediated repression of AFP expression [9], contributing to the development of HCC [33]. It is also capable of activating the 5'-upstream sequence of the *AFP* gene [34]. We have found that HBx drives the expression of AFP to activate PI3K/AKT signal to stimulate the expression of oncogenes in normal liver cells [31]. However, the exact mechanisms by which AFP and HBx synergize to drive malignant transformation of liver cells remains to be determined.

In our current study, we sought to determine whether AFP was a pivotal intracellular factor in HBx-mediated hepatocarcinogenesis. We hypothesized that AFP mediates the activation of the PI3K/AKT/mTOR pathway and promotes the HBx-induced expression of Ras, Src, and CXCR4 in hepatocytes.

## RESULTS

### AFP and oncogene expression during the development of HBV-related HCC

We studied the expression of AFP; downstream targets of the PI3K/AKT signaling pathway, AKT, pAKT (Ser473), and p-mTOR (Ser2448); and the oncogenes *Src*, *CXCR4*, and *Ras* in liver tissue samples from 63 patients by immunohistochemical staining and immunoblotting. AFP was expressed in all HBV-infected tissues, but at a much higher level in HCC tissues than in other liver

tissues (Figure 1A and 1B). Ras, CXCR4, pAKT (Ser473), and p-mTOR (Ser2448) were expressed in all liver tissue samples, with progressive elevation of expression from normal liver tissue to HBV-infected tissue to cirrhotic tissue to HCC tissue. Src expression was limited to cirrhotic and HCC tissues (Figure 1A and 1B). Consistent with the results of Western blot analysis, the expression of AFP and CXCR4 mRNA were also increased as determined by quantitative RT-PCR analysis (Supplementary Figure 1A). The levels of pAKT (Ser473) and p-mTOR (Ser2448) were significantly higher in AFP+/HBV+ liver tissues than in AFP-/HBV+ or AFP-/HBV- liver tissues (Figure 1C). We confirmed the binding of AFP to PTEN in cirrhotic and HCC tissue samples (Figure 1D). We also observed interactions between HIF-1 $\alpha$  and p-mTOR(Ser2448) in HBV-infected, cirrhotic, and HCC tissues (Figure 1E). Finally, to verify that p-mTOR(Ser2448) linked HIF-1 $\alpha$  to trigger the transcription activity of downstream oncogenes, a ChIP assay was performed. The specific p-mTOR (Ser2448)-HIF-1 $\alpha$ -DNA complex was immunoprecipitated using an anti-p-mTOR (Ser2448) antibody, and then to amplify the HIF-1 $\alpha$  binding sequences of downstream genes promoter. As shown in Figure 1F, anti-p-mTOR (Ser2448) antibodies, but not control IgG, amplified the predicted size DNA fragments from the precipitates of the samples. These results indicated that p-mTOR(Ser2448)-enhanced HIF-1 $\alpha$  binding to the promoters of *Src*, *CXCR4*, and *Ras* genes.

### Timing of AFP and oncogene expression during HBx-induced malignant transformation of human normal liver cells *in vitro*

We transfected a vector expressing the HBV protein HBx, pcDNA3.1-HBx, into human liver cell lines L-02 and CHL and measured the impact of pcDNA3.1-HBx on the expression of AFP and the oncogenes *Src*, *CXCR4*, and *Ras*. The pcDNA3.1-HBx-mediated induction of HBx expression in L-02 and CHL cells was evident 2 days after transfection and remained elevated between 7 and 28 days after transfection (Figure 2A). Expression of AFP was emerged after transfected with pcDNA3.1-HBx for 7 days and persisted increasing after 28 days. Expression of CXCR4 and Ras was enhanced 7 day after transfection and increased for 28 days in both L-02 and CHL cells (Figure 2B). The expressions of AFP and CXCR4 were further confirmed at the mRNA levels by quantitative RT-PCR analysis (Supplementary Figure 1B). Src expression was elevated 14 days after transfection in both L-02 and CHL cells (Figure 2B).

### Interaction of AFP and PTEN in malignant liver cells

PTEN is a critical inhibitor of PI3K activation [38, 39], and the PI3K/AKT signaling pathway plays a pivotal role in the development of HBV-related HCC [40].

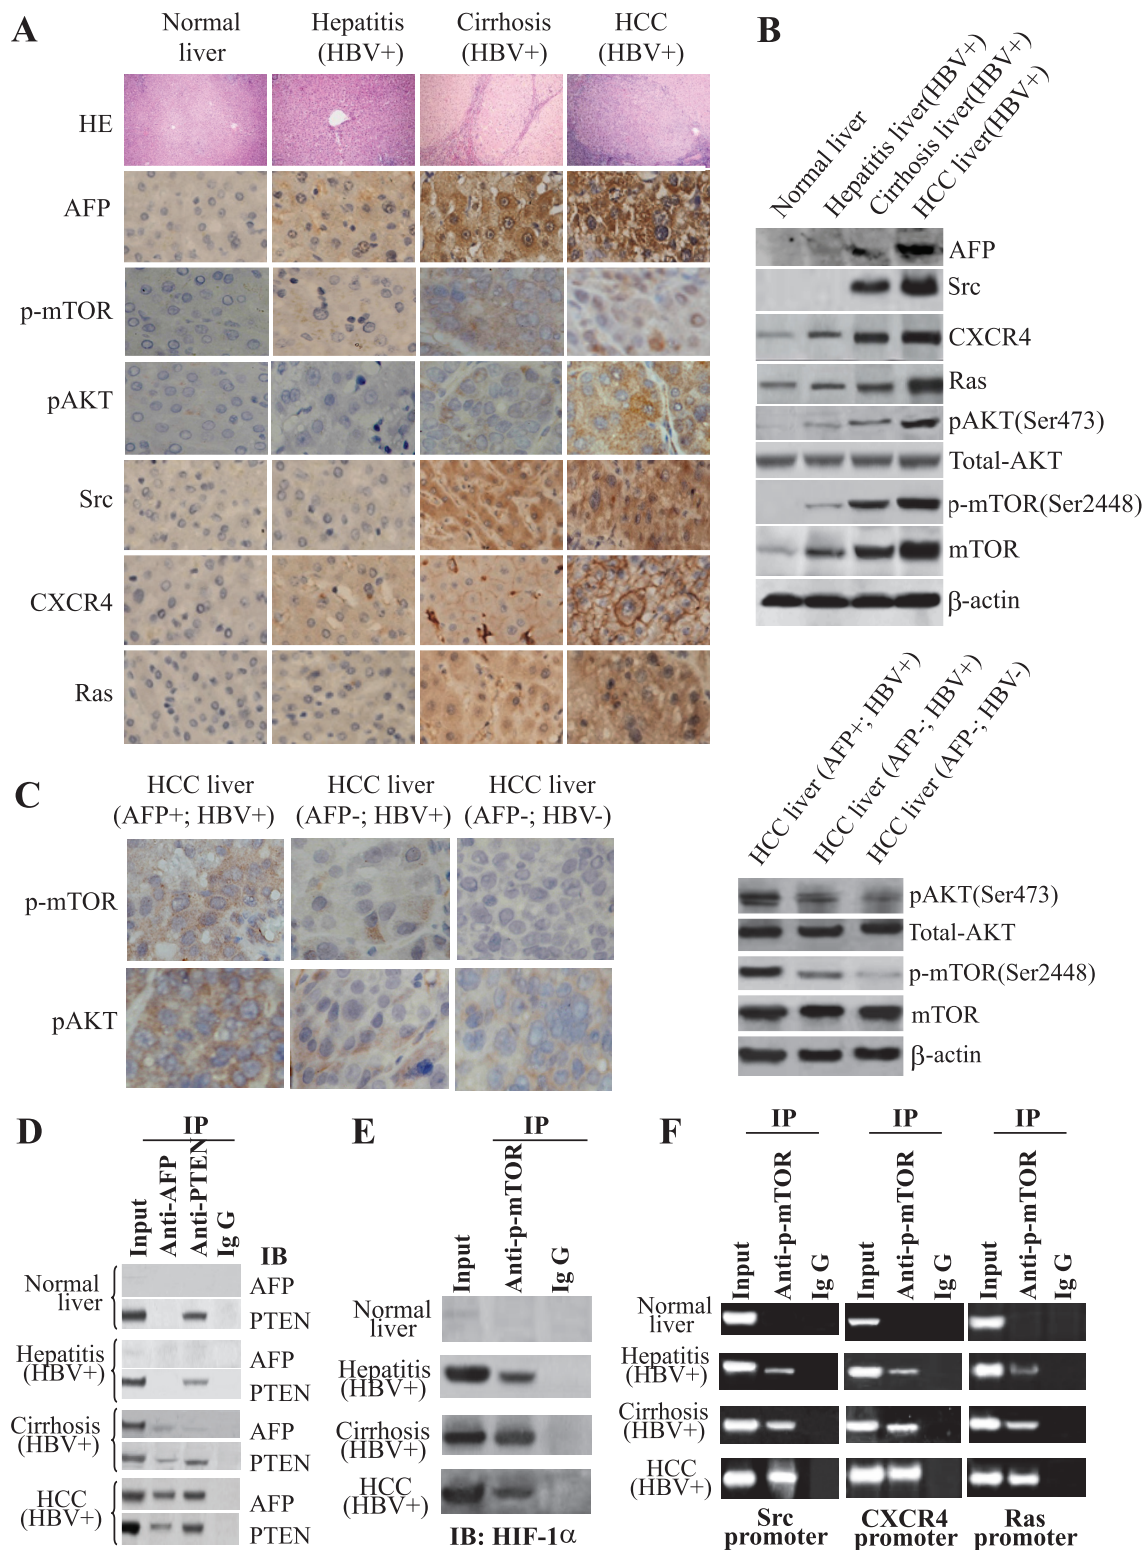

**Figure 1: Influence of AFP on HBV-mediated malignant transformation of liver cells *in vivo*.** (A) Expression of AFP, p-mTOR(Ser2448), pAKT(Ser473), Src, CXCR4, and Ras was detected by immunohistochemistry (IH). IH images are shown at 400x and hematoxylin-eosin staining (HE) at 100x. (B) Expression of AFP, p-mTOR(Ser2448), pAKT(Ser473), Src, CXCR4, and Ras was detected by immunoblotting. (C) Expression and location of p-mTOR(Ser2448) and pAKT(Ser473) were assessed in AFP(+)/HBV(+), AFP(-)/HBV(+), and AFP(-)/HBV(-) HCC tissues by IH. pAKT(Ser473), total AKT, and p-mTOR(Ser2448) mTOR levels were detected by Western blotting. (D) The interaction of AFP and PTEN was assessed by Co-IP. (E) The interaction of p-mTOR(Ser2448) and HIF-1 $\alpha$  was assessed by Co-IP. (F) p-mTOR(Ser2448) co-activated transcription of HIF-1 $\alpha$ . Interaction of HIF-1 $\alpha$  with the promoters of Src, CXCR4, and Ras was assessed by chromatin immunoprecipitation. Results are from one representative experiment of three. IgG – immunoglobulin G.



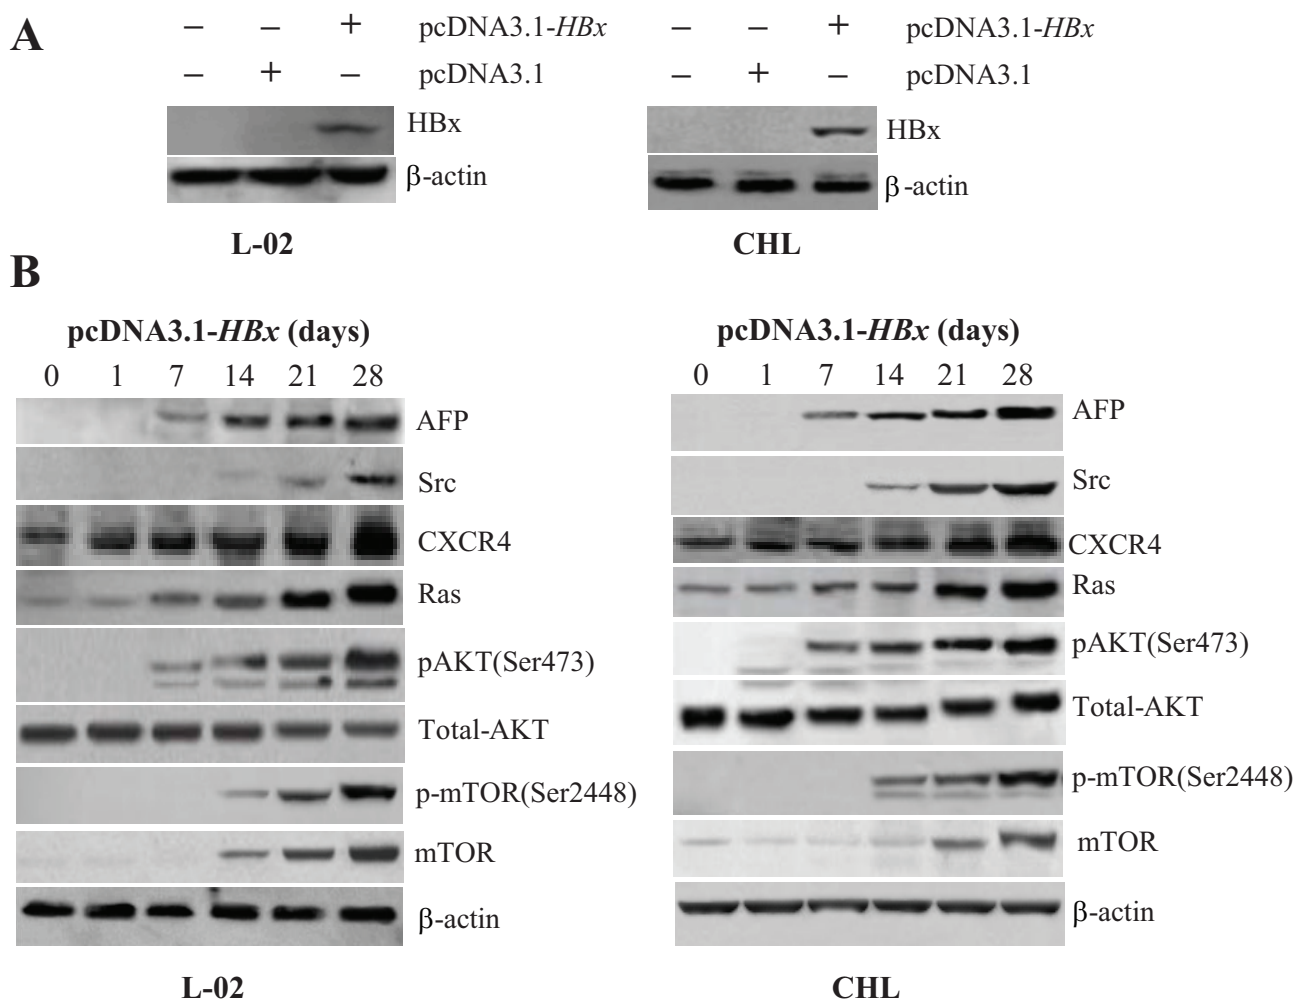

**Figure 2: Effects of pcDNA3.1-HBx on the expression of AFP, Src, CXCR4, Ras, pAKT(Ser473), and p-mTOR(Ser2448) in liver cells.** (A) L-02 and CHL liver cells were transfected with pcDNA3.1-HBx and expression of HBx was measured 48 hours later by Western blotting. (B) Expression of Src, CXCR4, Ras, pAKT(Ser473), and p-mTOR(Ser2448) was measured by Western blotting 1, 7, 14, 21, and 28 days after transfection. Results are from one representative experiment of three.

To investigate the interaction between AFP and PTEN, we used L-02-X, and CHL-X, and PLC/PRF/5 cells. Immunoblotting analysis showed that *HBx* transfection induced AFP expression in L-02 and CHL cells, and AFP-siRNA significantly decreased the expression of AFP in those cells. Co-IP indicated that AFP bound with PTEN in L-02-X, CHL-X, and PLC/PRF/5 cells, but the binding vanished when those cells were transfected with AFP-siRNA (Figure 3A and 3B). AFP binding with PTEN was also observed by immunoblotting and Co-IP in non-AFP-producing HLE HCC cells. Twenty-four hours after transfection of the HLE cells with pcDNA3.1-*afp*, the expression of AFP was stimulated as measured by immunoblotting, and AFP binding with PTEN was evident as demonstrated by Co-IP (Figure 3C). We further applied laser confocal microscopy to observe the location of the AFP-PTEN complex in L-02-X, CHL-X, and PLC/PRF/5 cells. The results indicated that

AFP and PTEN were superimposed in the cytoplasm (Supplementary Figure 2). Laser confocal microscope software analysis indicated contiguous distant adequate delivery of fluorescent energy between AFP and PTEN molecules (Supplementary Figure 3). Thus, our data clearly suggested a direct interaction between AFP and PTEN in malignant liver cells.

### Role of AFP in p-mTOR(Ser2448) translocation into the nucleus and HIF-1 $\alpha$ -induced expression of Src, CXCR4, and Ras in malignant liver cells

The PI3K/AKT signaling pathway regulates gene expression through activation of mTOR. We explored the influence of AFP on the activity of mTOR. Laser confocal microscope observations revealed that in the normal human liver L-02 and CHL cell lines, p-mTOR(Ser2448) was located only in the cytoplasm, but p-mTOR(Ser2448)

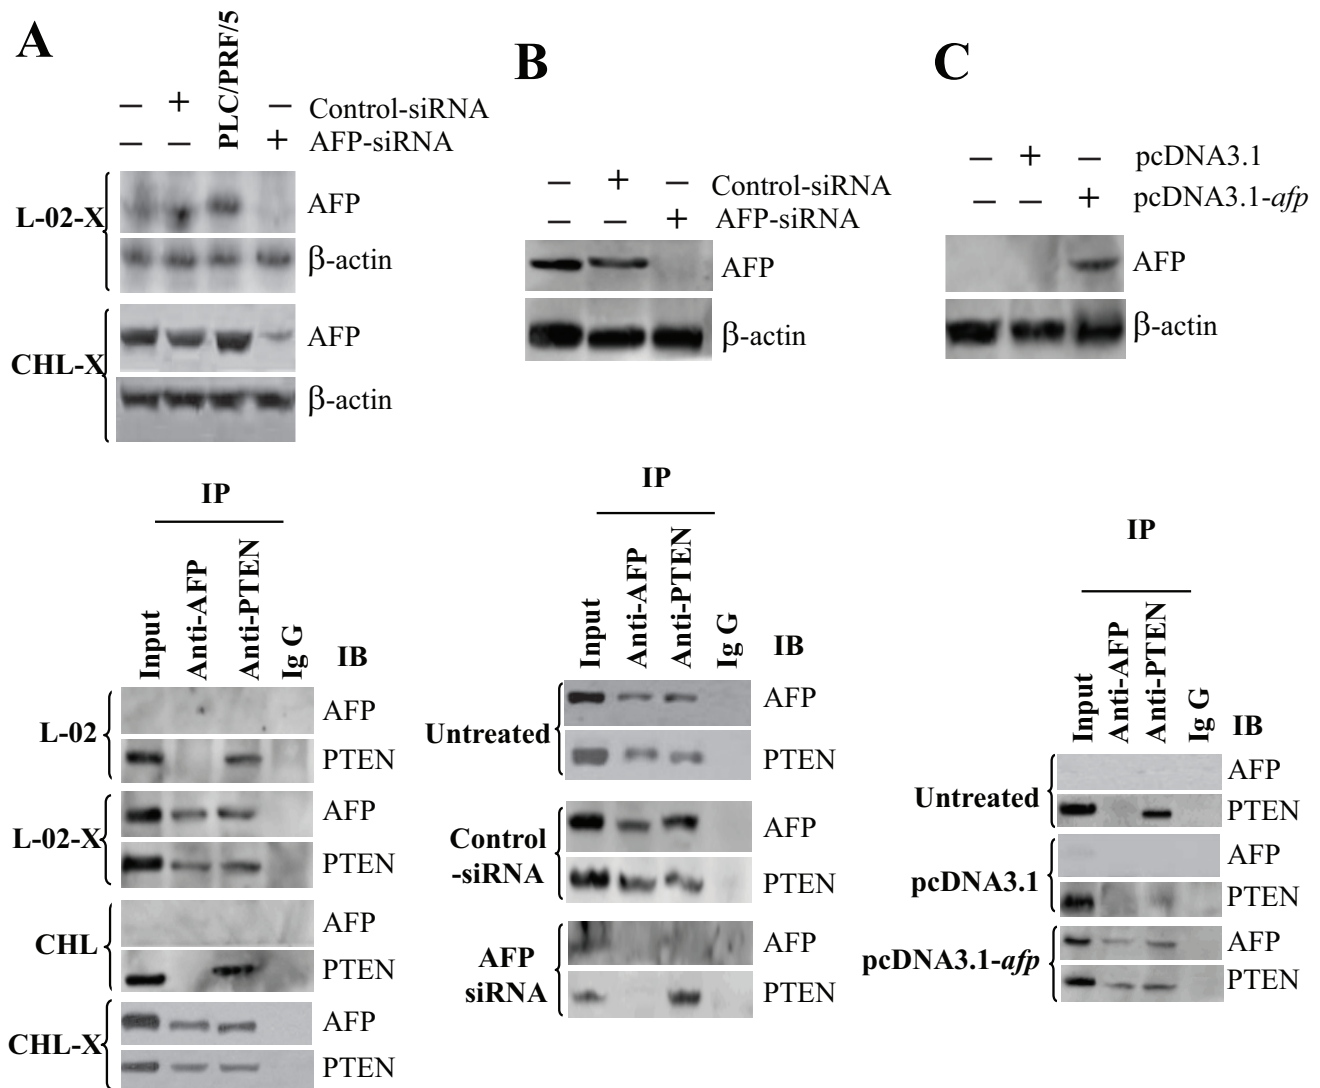

**Figure 3: The interaction and co-localization of AFP with PTEN in liver cells.** (A) The pcDNA3.1-*HBx* and a control vector were transfected into L-02 and CHL cells, and the expression of AFP and the interaction of AFP with PTEN were determined by Western blotting and Co-IP. (B) The expression of AFP and interaction of AFP with PTEN were also determined by Western blotting and Co-IP in AFP-siRNA-transfected PLC/PRF/5 cells. (C) The expression of AFP and interaction of AFP with PTEN were also determined by Western blotting and Co-IP in pcDNA3.1-*afp*-transfected HLE cells.

was located in the cytoplasm and nucleus of the AFP-producing and HBx-expressing malignant liver cell lines L-02-X, and CHL-X, and in HCC and PLC/PRF/5 cells. Transfection of AFP-siRNA into those cells repressed p-mTOR(Ser2448) migration to the nucleus, and p-mTOR(Ser2448) was activated and migrated into the nucleus when the non-AFP-producing/non-HBV-infected cell line HLE were transfected with an AFP-expression vector, pcDNA3.1-*afp* (V-afp), however, which can be obviously suppressed by administration of PI3K/Akt signaling inhibitor Ly294002 (10  $\mu$ M) (Figure 4A), suggesting that activation of PI3K/Akt pathway was crucial for AFP-mediated p-mTOR(Ser2448) migration into the nucleus. A previous study reported that p-mTOR(Ser2448)

is a co-factor of transcription and synergizes with HIF-1 $\alpha$  to regulate the expression of vascular endothelial growth factor in HCC cells [41]. Therefore, we investigated the interaction of p-mTOR(Ser2448) and HIF-1 $\alpha$  and the co-localization of p-mTOR(Ser2448) and HIF-1 $\alpha$  in normal human liver L-02, CHL cells, L-02-X, CHL-X, PLC/PRF/5, and HLE cells by laser confocal microscope (Supplementary Figure 4). Moreover, co-IP results also demonstrated that p-mTOR(Ser2448) bound with HIF-1 $\alpha$  in L-02-X, CHL-X, PLC/PRF/5, and HLE cells but not in L-02 and CHL cells (Figure 4B). The p-mTOR(Ser2448) enhanced HIF-1 $\alpha$  interaction with the promoter sequences of Src, CXCR4, and Ras in L-02-X, CHL-X, PLC/PRF/5, and HLE cells but not in L-02 and CHL cells. HIF-1 $\alpha$  interactions with

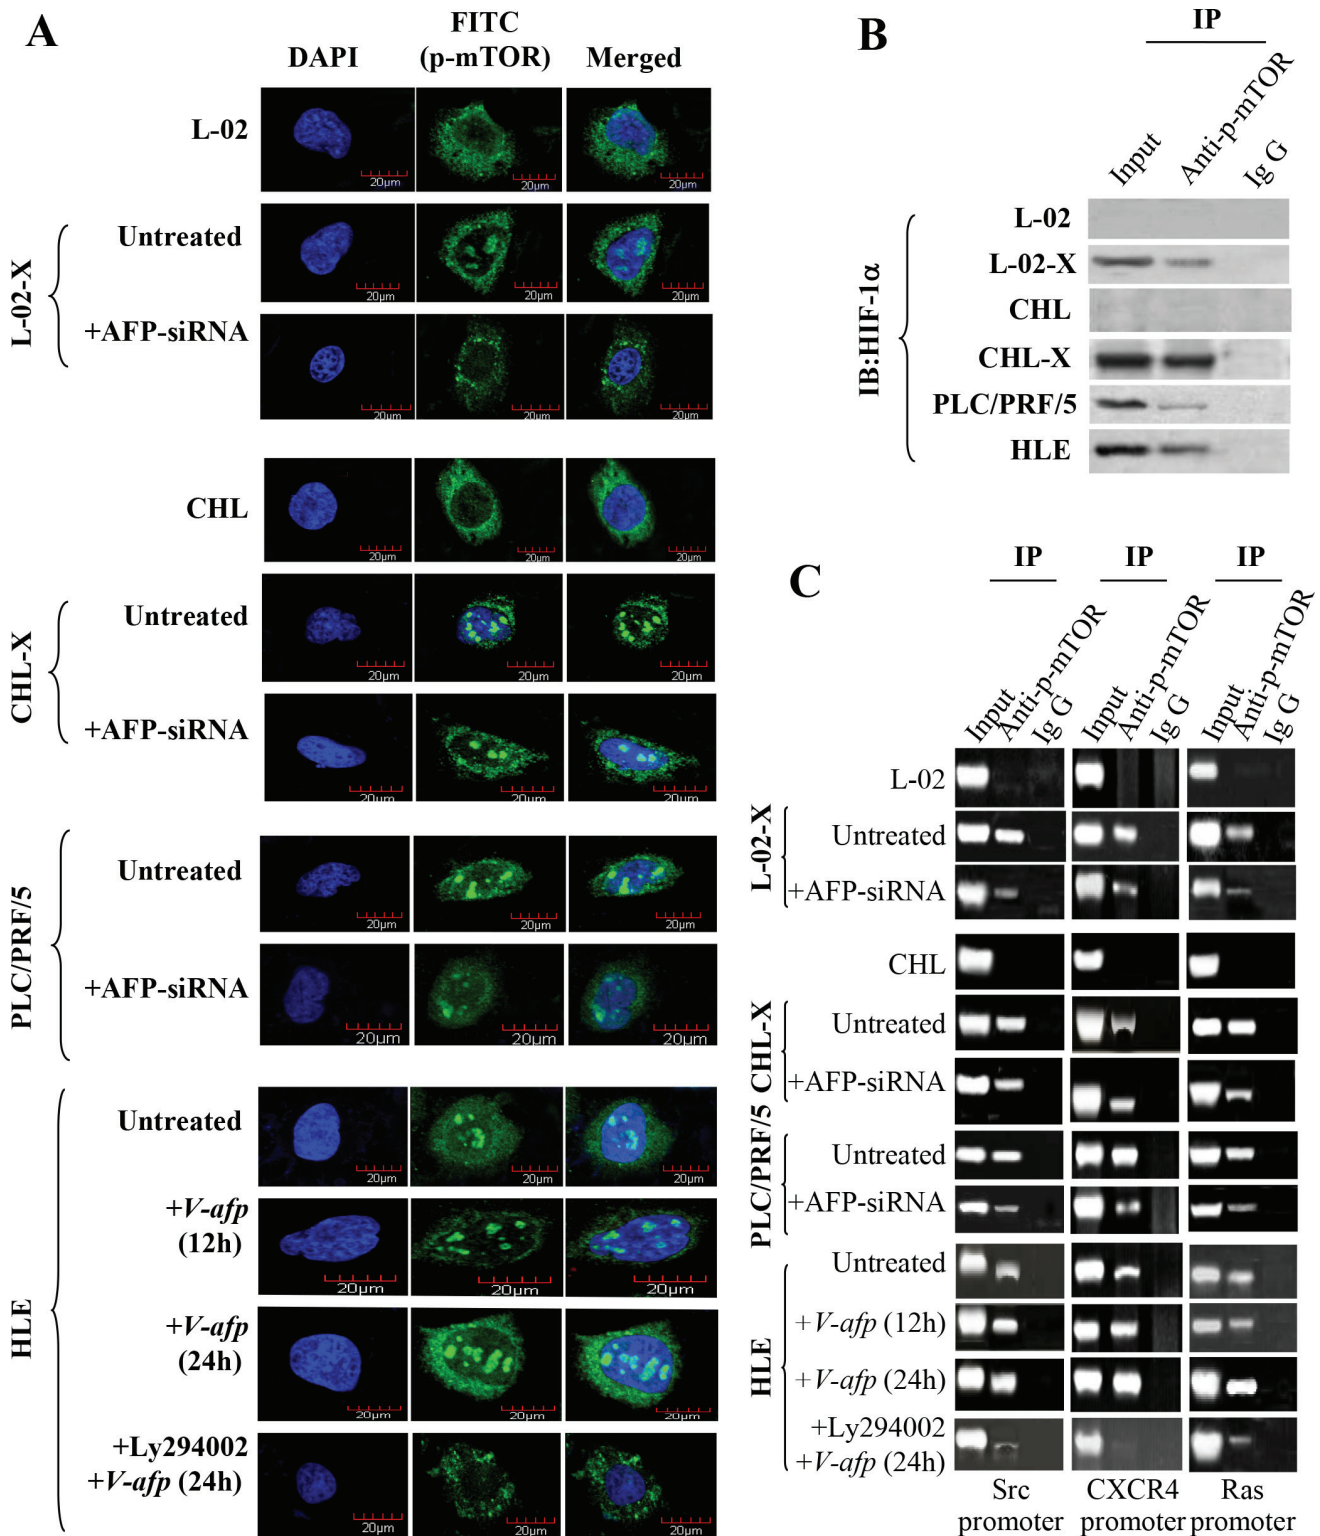

**Figure 4: Activation of mTOR by AFP and upregulation of HIF-1 $\alpha$  transcription and expression of Src, CXCR4, and Ras in liver cells. (A)** AFP induced p-mTOR(Ser2448) nuclear translocation in L-02, CHL, PLC/PRF/5, HLE, L-02-X, and CHL-X cells was observed by laser confocal microscopy. **(B)** Interaction of p-mTOR(Ser2448) with HIF-1 $\alpha$  in L-02, CHL, PLC/PRF/5, HLE, L-02-X, and CHL-X cells was detected by Co-IP. **(C)** mTOR was activated by AFP to co-activate the transcription of HIF-1 $\alpha$ , regulating the expression of Src, CXCR4, and Ras in L-02, CHL, PLC/PRF/5, HLE, L-02-X, and CHL-X cells and in pcDNA3.1-*afp*-transfected and Ly294002-treated HLE cells. The transcription coactivator of p-mTOR(Ser2448) in HIF-1 $\alpha$  interaction with promoters of Src, Ras, and CXCR4 genes was analyzed by chromatin immunoprecipitation. Results are from one representative experiment of three.



the *Src*, *CXCR4*, and *Ras* gene promoters were suppressed in AFP-siRNA-transfected L-02-X and CHL-X cells and PLC/PRF/5 cells. The binding effect was weak in the HLE cells but was enhanced when transfected with pcDNA3.1-*afp*, moreover, the increased interaction of HIF-1 $\alpha$  with downstream genes promoter were dependent on the activation of PI3K/Akt pathway (Figure 4C) We concluded that AFP accelerated the migration of p-mTOR(Ser2448) into the nucleus and stimulated the interaction of HIF-1 $\alpha$  with the promoter sequences of *Src*, *CXCR4*, and *Ras*.

### Role of AFP in PI3K/mTOR signaling pathway activation and expression of *Src*, *CXCR4*, and *Ras* protein expression

We further analyzed the effects of AFP on PI3K/AKT signaling pathway transduction in L-02-X, CHL-X, PLC/PRF/5, and HLE cells using the PI3K inhibitor Ly294002. Immunoblotting results indicated that AFP-siRNA, which is functionally similar to Ly294002, repressed the expression of pAKT(Ser473) and p-mTOR(Ser2448) (Figure 5A) and inhibited the

expression of *Src*, *CXCR4*, and *Ras* (Figure 5B). The expression of pAKT(Ser473), p-mTOR(Ser2448), *Src*, *CXCR4*, and *Ras* was enhanced when HLE cells were transfected with pcDNA3.1-*afp*, and these effects were attenuated when the cells were treated with Ly294002 (Figure 5C). Thus, AFP represented a pivotal factor in the activation of the PI3K/mTOR signaling pathway.

### DISCUSSION

In the present study, we have provided several lines of evidence supporting AFP involvement in the early stages of HBV-related hepatocarcinogenesis. Specifically, we have found that expression of AFP occurs prior to upregulation of the oncogenes *Src* and *Ras*. In both cirrhotic and HCC liver tissues, in which AFP is significantly upregulated, Co-IP analyses revealed that AFP interacts with PTEN, stimulates pAKT(Ser473) and p-mTOR(Ser2448) expression, and enhances the binding of HIF-1 $\alpha$  to the promoters of *Src*, *Ras*, and *CXCR4*. Engineered expression of HBx stimulated AFP expression before *Src* and *Ras* expression. Thus, HBx

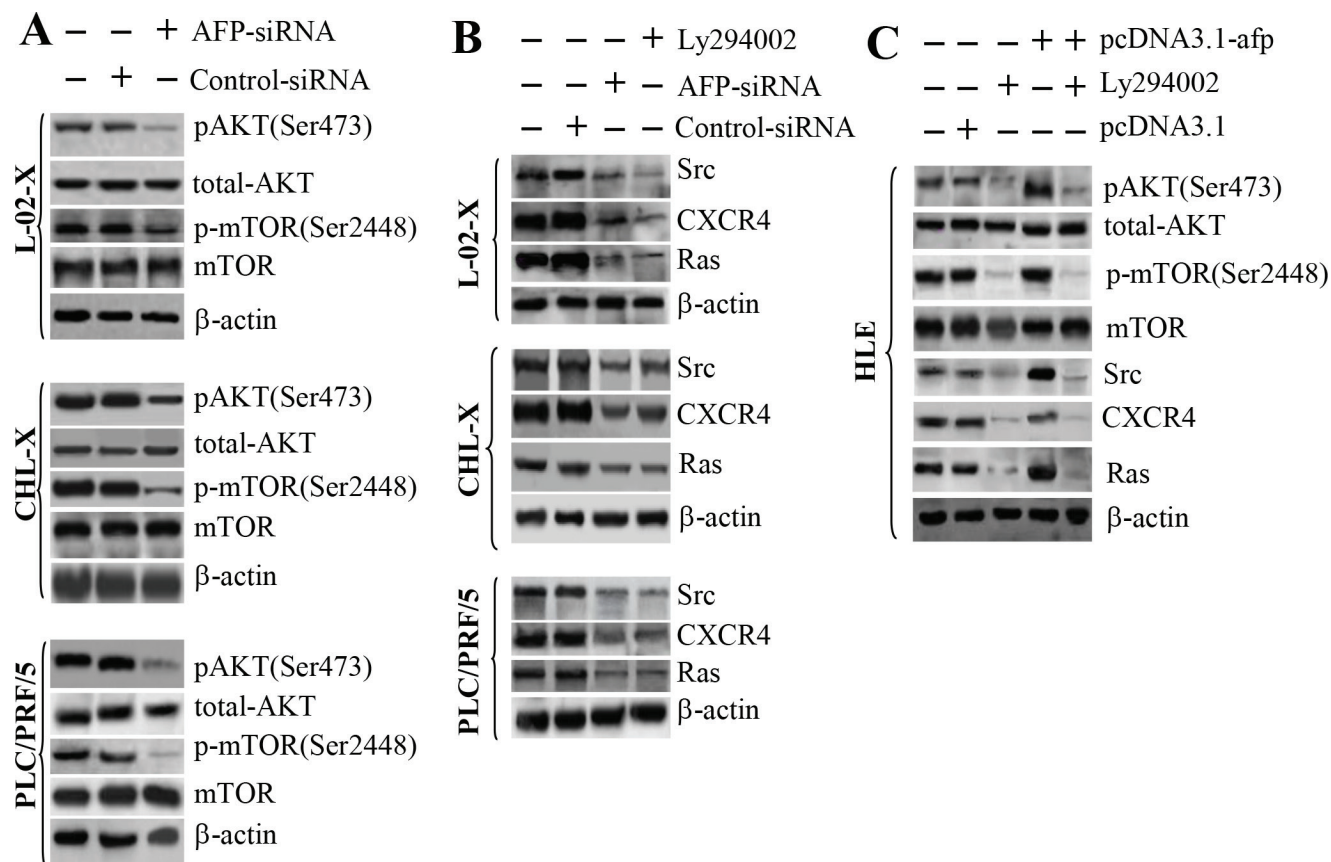

**Figure 5: Effects of AFP on the expression of pAKT(Ser473), p-mTOR(Ser2448), *Src*, *Ras*, and *CXCR4* in L-02, CHL, PLC/PRF/5, HLE, L-02-X, and CHL-X cells. (A) The impact of AFP-siRNA on the expression of pAKT(Ser473) and p-mTOR(Ser2448) was assessed by immunoblotting. (B) The impact of the AFP-siRNA vector on the expression of *Src*, *CXCR4*, and *Ras* was detected by Western blotting. (C) The expression of pAKT(Ser473), p-mTOR(Ser2448), *Src*, *CXCR4*, and *Ras* in HLE cells was assessed by Western blotting after transfection with pcDNA3.1-*afp* for 48 hours. Results are from one representative experiment of three.**

induces malignant transformation of liver cells via the upregulation of AFP, which promotes the proliferation of HCC cells by activating the PI3K/mTOR signaling pathway and suppressing PTEN activity.

Prior studies have shown that AFP is an important biomarker of HCC [16] and is upregulated in HBV-transfected human hepatoma cells [34, 42]. In our current study, we found that the expression of AFP was promoted when normal human liver cells were transfected with pcDNA3.1-HBx. Consistently, HBx activates the 5'-upstream sequence of the *AFP* gene [43]. The increased expression of AFP appears to occur before the expression of other oncogenes, *e.g.*, *Src* and *Ras*. It is known that phosphorylation of AKT is enhanced by PI3K, activating a cascade of downstream targets, including p-mTOR(Ser2448), and accelerated the nuclear import of certain transcription factors. The synergistic effect of p-mTOR(Ser2448) with HIF-1 $\alpha$  on the expression of oncogenes has also been previously reported [41, 44]. We found that AFP plays a role in enhancing the nuclear entry of p-mTOR(Ser2448). Interestingly, p-mTOR(Ser2448) interacted with HIF-1 $\alpha$  in the cytoplasm, and HIF-1 $\alpha$  bound to the promoters of *Src*, *CXCR4*, and *Ras*, strongly indicating that AFP promoted the nuclear import of p-mTOR(Ser2448) and HIF-1 $\alpha$ .

Although HBx may trigger PI3K activity, reducing apoptosis of transformed liver cells [15], the molecular mechanisms of this process have not been well understood. AFP, an onco-embryo protein, is expressed at a high level during development but silenced for 2 years after birth

[44, 45]. *AFP* gene expression is reactivated when liver cells are infected with HBV [9]. The mechanism underlying this change is unclear. In our current study, we found that the expression of AFP was triggered in normal human liver cells transfected with an HBx expression vector and that, in AFP-producing HCC cells, transfection with the AFP-siRNA vector repressed AFP expression and decreased the levels of pAKT(Ser473), p-mTOR(Ser2448), *Src*, *CXCR4*, and *Ras*. These effects were similar to those achieved by the use of Ly294002, a specific PI3K inhibitor. Moreover, when cells that do not produce AFP were transfected with the AFP expression vector, the expression of pAKT(Ser473) and p-mTOR(Ser2448) were increased, and this increased expression could be attenuated by Ly294002. Given that Ly294002 inhibits the phosphorylation of AKT by PI3K and that Ly294002 also restrains AFP-stimulated expression of pAKT(Ser473) and p-mTOR(Ser2448), HBx may initiate the activation of PI3K/mTOR at least in part through inducing AFP expression.

Furthermore, we have found that AFP promoted nuclear translocation of p-mTOR(Ser2448), resulting in HBx-stimulated expression of *Src*, *CXCR4*, and *Ras* in normal human liver cells, as outlined in the schematic diagram of HBV-induced malignant transformation of liver cells (Figure 6). Accumulating evidence suggests that HBx maintains the survival of HBV-infected liver cells by activating PI3K, *Src*, and *Ras* [46, 47]. Recently, investigation indicated that AFP activated PI3K/AKT signal pathway to promote proliferation of hepatoma

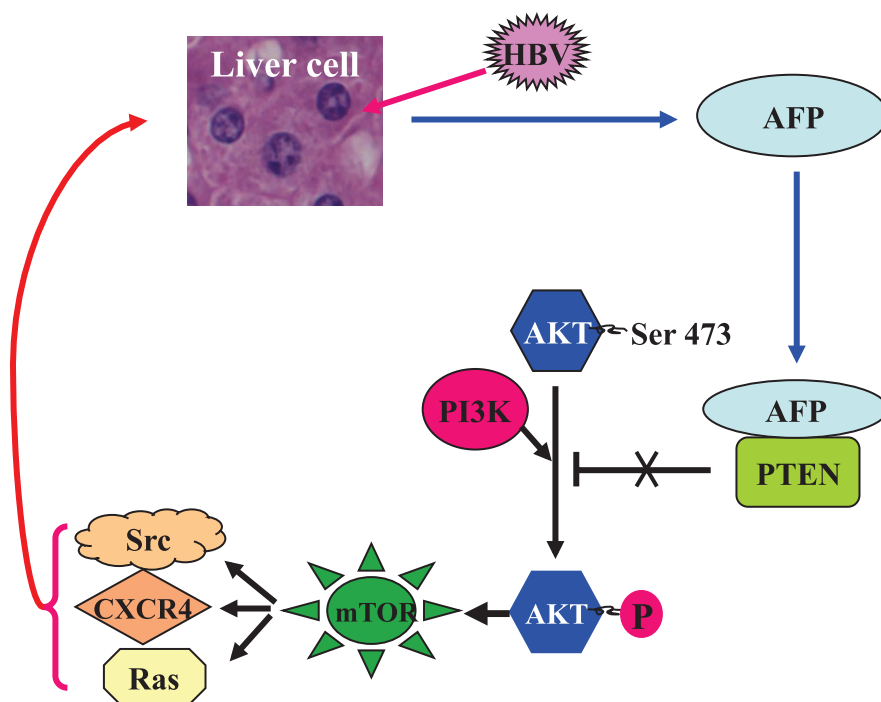

**Figure 6: A schematic role of AFP in the HBV-driven malignant transformation of liver cells.** HBV infection stimulates the expression of AFP, which binds to PTEN and attenuates its function, thus activating the PI3K/AKT/mTOR pathway and promoting the HBx-induced expression of *Ras*, *Src*, and *CXCR4* in hepatocytes, and collectively driving malignant transformation of liver cells.



cells [48]. In this study, our results demonstrated that HBx stimulates the neoplastic transformation of normal cells and tumor induction by AFP triggering of the PI3K/mTOR signal to promote expression of Src, Ras, and CXCR4, which are known to promote the progression, invasion, and metastasis of cancer cells [49]. Consistently, HBV-related HCC in patients with high levels of serum AFP appears to have a high metastatic potential [50]. Those studies suggest that AFP could be critically important at both the early and advanced stages of hepatocarcinogenesis.

In summary, HBV infection stimulates AFP expression, and AFP is a pivotal intracellular factor, activating the PI3K/AKT/mTOR pathway and promoting the HBx-induced expression of *Ras*, *Src*, and *CXCR4* in hepatocytes. Collectively, our results further substantiate the critical role of AFP and HBx in the early stage of hepatocarcinogenesis. Therefore, limiting AFP expression and function may represent a potential intervention strategy to attenuate HBV-related hepatocarcinogenesis.

## MATERIAL AND METHODS

### Clinical specimen collection

Archived clinical specimens were originally collected during hepatectomy of 63 patients at Hainan Provincial People's Hospital between 2008 and 2012. Of the 63 patients, 44 were male and 19 were female. The ages ranged between 22–76 years with an average age of 49 years (Supplementary Table 1). All enrolled patients were treated with radical surgery and received no other treatments. HBV infection was diagnosed by a serum hepatitis B surface antigen test, and circulating AFP plasma level was measured by enzyme-linked immunosorbent assay. Clinical data were obtained by retrospective chart review. Follow-up was available for all patients. A liver tissue about  $2.0 \times 2.0 \times 2.0$  cm was obtained from each patient immediately after the surgery. About  $1.0 \times 1.0 \times 1.0$  cm tissue samples were fixed in 10% formalin, embedded in paraffin, and routinely stained with hematoxylin and eosin. Specimens were assessed blindly and independently by two pathologists. In case of inter-observer disagreement, final decisions were achieved by general consensus. All selected patients were diagnosed by histopathologic evaluation. About  $1.0 \times 1.0 \times 1.0$  cm tissue specimens were stored in formalin and liquid nitrogen. The study protocol was approved by the Ethical Committee of Hainan Provincial Peoples' Hospital and the Science Investigation Ethical Committee of Hainan Medical College. Written informed consent was obtained from all participants.

### Immunohistochemical staining

The tumor samples of six patients were randomly selected for immunohistochemical staining. Following

deparaffinization and antigen retrieval, the slides were blocked with 3% hydrogen peroxide for 10 minutes and then incubated with mouse anti-AFP (Cat.#sc-8399), goat anti-Src (Cat.#sc-6096), mouse anti-CXCR4 (Cat.# sc-53534), mouse anti-N-ras (Cat.#sc-31) (all from Santa Cruz Biotechnology), rabbit anti-phosphorylated AKT1 (pAKT; Ser473, Cat.#ab8932) and anti-phosphorylated mTOR (p-mTOR; Ser2448, Cat.#ab84400) (Abcam Biotech Company, Cambridge, UK) at 4°C overnight. After washing, sections were incubated with secondary goat anti-mouse antibodies (Merck-Calbiochem) at room temperature for 60 minutes and then developed with 3,3-diaminobenzidine chromogen solution in 3,3-diaminobenzidine buffer substrate (Merck Chemicals). Sections were visualized with 3,3-diaminobenzidine and counterstained with hematoxylin. All sections were visualized by microscope (Olympus).

### Cell lines

Human normal liver cell lines (L-02 and Chang liver [CHL]) were purchased from the Shanghai Institution of Cellular Biology, Science Academy of China and were cultured in RPMI 1640 medium supplemented with 10% fetal calf serum. The AFP-producing and HBV-infected cell line PLC/PRF/5 and the non-AFP-producing/non-HBV-infected cell line HLE were gifts from the Department of Cell Biology, Peking University and were maintained in Dulbecco's modified Eagle's medium supplemented with 10% fetal calf serum. All cell lines were cultured at 37°C in a humidified atmosphere containing 5% CO<sub>2</sub>.

### Generation of HBx- and AFP-expressing constructs

Construction of the HBx-expressing construct (pcDNA3.1-*HBx*) and the primer used for HBx gene amplification have been previously described [31]. The construct pcDNA3.1-*HBx* was transfected into L-02 and CHL cells to measure the impact of pcDNA3.1-*HBx* on the expression of AFP and the oncogenes *Src*, *CXCR4*, and *Ras*. Stably transfected L-02 and CHL cells were selected using G418 (Cat No. 30–234-CR, Mediatech Inc, Manassas, USA) and named L-02-X and CHL-X, respectively. Construction of the full-length AFP-expressing vector (pcDNA3.1-*afp*) and Full-length human AFP cDNA was obtained by RT-PCR amplification the primer used for amplification of the *afp* gene have been previously described [18].

### RNA interference assay and AFP-expressing vector construction

RNA interference was used to assess the effect of AFP on the PI3K/AKT signaling pathway as described

previously [18, 35], and the AFP-expressing vector construct has been described previously [36].

### RNA extraction and quantitative RT-PCR

Total RNA was extracted with Trizol reagent (Invitrogen, Carlsbad, CA, USA). One  $\mu\text{g}$  of total RNA was used as template to generate the cDNA by oligo (dT18) using Fermentas RT System (cat.#K1622, Thermo Scientific, Guangzhou, China). The pairs of primers were synthesized by Sangon Biotech Co., Ltd. (Shanghai, China) as following, *AFP*: forward 5'-ccaacaggaggccatgctt-3', *AFP* reverse 5'-gaatgcaggaggacatagttt-3'; *CXCR4* forward 5'-atcagtctggaccgctacct-3', *CXCR4* reverse 5'-ccacctttcagccaacagc-3';  $\beta$ -*actin* forward 5'-tgacgtggacatccgcaaag-3',  $\beta$ -*actin* reverse 5'-ctggaaggtggacagcgagg-3'. PCR was conducted using the LightCycler480 II instrument [Roche (China) Ltd., Guangzhou, China]. The total volume was 20  $\mu\text{L}$ , which include 10  $\mu\text{L}$  SYBR Green I PCR Master Mix (TOYOBO, OSAKA, Japan), 0.4  $\mu\text{L}$  forward primer (10  $\mu\text{M}$ ), 0.4  $\mu\text{L}$  reverse primer (10  $\mu\text{M}$ ), 2  $\mu\text{L}$  cDNA and 7.2  $\mu\text{L}$  ddH<sub>2</sub>O. The PCR amplification was as follow: after denaturation at 95°C for 1 min, 45 PCR cycles were performed including 95°C for 15 sec, 60°C for 60 sec. The relative abundance of target mRNAs were determined from the CT values and plotted as the fold change compared with that of the control groups.

### Western blotting and co-immunoprecipitation (Co-IP) analysis

Western blotting was employed to assess the protein levels of AFP, pAKT (Ser473), p-mTOR (Ser2448), Src, CXCR4, and Ras. Co-IP was employed to assess the binding of AFP to PTEN, p-mTOR(Ser2448), and HIF-1 $\alpha$  in patient specimens and cell lines as described previously [18, 36].

### Fluorescence resonance energy transfer (FRET) analysis of intracellular co-localization of AFP and PTEN

Fluorescence resonance energy transfer was employed to investigate the interaction between AFP and PTEN in L-02, L-02-X, CHL, CHL-X, PLC/PRF/5, and HLE cell lines as previously described [36]. Briefly, cells were fixed in paraformaldehyde (4%), and rabbit anti-PTEN antibody and mouse anti-human AFP antibody (Santa Cruz Biotechnology) were added and incubated for 12 hours. Secondary goat anti-mouse or anti-rabbit immunoglobulin G conjugated with fluorescence isothiocyanate (FITC) or tetramethylrhodamine isothiocyanate (Zhongshan Biol Tech Co., Beijing) was applied for 2 hours, followed by the addition of 100  $\mu\text{L}$  of 4',6-diamidino-2-phenylindole (DAPI) (1  $\mu\text{g}/\text{mL}$ ). Cells were visualized with the Leica TCS-NT SP2 laser confocal microscope and associated

software (Leica Camera) and analyzed by fluorescence resonance energy transfer.

### Laser confocal microscopy observation

The staining procedure for confocal microscopy has been previously described [35]. Briefly, cells were fixed in 4% paraformaldehyde and incubated with rabbit anti-human p-mTOR (Ser2448) antibody for 12 hours. FITC-conjugated secondary anti-rabbit immunoglobulin G was added and incubated for 2 hours, followed by the addition of 100  $\mu\text{L}$  DAPI (1  $\mu\text{g}/\text{mL}$ ) and 30 minutes of incubation. Cells were visualized with the Leica TCS-NT SP2 laser confocal microscope (Leica Camera).

### Chromatin immunoprecipitation assay

The interaction of p-mTOR (Ser2448) with the promoter sequences of *Src*, *CXCR4*, and *Ras* genes in liver tissues and cell lines was assessed via chromatin immunoprecipitation assay, as previously described [18, 37]. Immunoprecipitation with p-mTOR (Ser2448) antibody and polymerase chain reaction was used to analyze HIF-1 $\alpha$  binding with the promoter of aim genes. The PCR primers used were: *Src*: Forward, 5'-ctctctgtcatcccagttctcg-3', Reverse, 5'-aggtgccacagccagctcaa-3'; *CXCR4*: Forward, 5'-ggcagcaggtagcaaagtga-3', Reverse, 5'-agacaatgtaactgctccaaga-3'; *Ras*: Forward, 5'-gctccgggtcagaattggc-3', and Reverse, 5'-accgccattcctcactcc-3'.

### ACKNOWLEDGEMENTS

The authors would like to thank Donald Norwood from the Department of Scientific Publication at The University of Texas MD Anderson Cancer Center, Houston, Texas for editorial assistance and Yuqiang Wu (Hainan Provincial People's Hospital, Haikou) and Gang Li (Peking University Health Science Center, Beijing, China) for their critical evaluation of the work and all members of the lab for fruitful discussion. We also thank XinHua Liu (Peking University Health Science Center, Beijing, China) for help with the experiments and the facilities of Histology, Immunostaining, Laser Microdissection, and Cell Imaging.

### Conflict of interest

The authors who have taken part in this study declared that they have no competing interests.

### Abbreviations

AFP, alpha-fetoprotein; Co-IP, co-immunoprecipitation; PI3K, phosphatidylinositol 3-kinase; AKT, protein kinase B; pAKT, phosphorylated AKT (Ser473); mTOR, Mammalian target of rapamycin; p-mTOR, phosphorylated mTOR

(Ser2448); PTEN, phosphatase and tensin homolog deleted on chromosome 10; HIF-1 $\alpha$ , hypoxia inducible factor-1 $\alpha$

## FINANCIAL SUPPORT

This work was supported by the National Natural Science Foundation of China (Nos. 81360307, 81260306, 81160261, 31060164, and 30960153), Key Program of Science and Technology, Ministry of Education of China (No. 211146), Key Projects of Science and Technology, Hainan Province (No. ZDXM 20110038), New Century Excellent Talents in China (NCET-10-0124), and Natural Science Foundation of Hainan Province (309034 and 310044)

## REFERENCES

1. Jemal A, Bray F, Center MM, Ferlay J, Ward E, Forman D. Global cancer statistics. *CA: A Cancer J Clin.* 2011; 61:69–90.
2. Liu S, Zhang H, Gu C, Yin J, He Y, Xie J, Cao G. Associations between hepatitis B virus mutations and the risk of hepatocellular carcinoma: A meta-analysis. *J Natl Cancer Inst.* 2009; 101:1066–1082.
3. Keng VW, Tschida BR, Bell JB, Largaespada DA. Modeling hepatitis B virus X-induced hepatocellular carcinoma in mice with the Sleeping Beauty transposon system. *Hepatology.* 2011; 53:781–790.
4. Kekulé AS, Lauer U, Weiss L, Luber B, Hofschneider PH. Hepatitis B virus transactivator HBx uses a tumour promoter signalling pathway. *Nature.* 1993; 361:742–745.
5. Twu JS, Lai MY, Chen DS, Robinson WS. Activation of protooncogene c-jun by the X protein of hepatitis B virus. *Virology.* 1993; 192:346–350.
6. Ng SA, Lee C. Hepatitis B virus X gene and hepatocarcinogenesis. *J Gastroenterol.* 2011; 46:974–990.
7. Xiang WQ, Feng WF, Ke W, Sun Z, Chen Z, Liu W. Hepatitis B virus X protein stimulates IL-6 expression in hepatocytes via a MyD88-dependent pathway. *J Hepatol.* 2011; 54:26–33.
8. Arzumanyan A, Sambandam V, Clayton M, Choi SS, Xie G, Diehl AM, Yu DY, Feitelson MA. Hedgehog signaling blockade delays hepatocarcinogenesis induced by hepatitis B virus X protein. *Cancer Res.* 2012; 72:5912–5920.
9. Ogden SK, Lee KC, Barton MC. Hepatitis B viral transactivator HBx alleviates p53-mediated repression of  $\alpha$ -fetoprotein gene expression. *J Biol Chem.* 2000; 275:27806–27814.
10. Truant R, Antunovic J, Greenblatt J, Prives C, Cromlish JA. Direct interaction of the hepatitis B virus HBx protein with p53 leads to inhibition by HBx of p53 response element-directed transactivation. *J Virol.* 1995; 69:1851–1859.
11. Ekshyyan O, Anandharaj A, Nathan CA. Dual PI3K/mTOR inhibitors: Does p53 modulate response? *Clin Cancer Res.* 2013; 19:3719–3721.
12. Yoo YG, Oh SH, Park ES, Cho H, Lee N, Park H, Kim DK, Yu DY, Seong JK, Lee MO. Hepatitis B virus X protein enhances transcriptional activity of hypoxia-inducible factor-1 $\alpha$  through activation of mitogen-activated protein kinase pathway. *J Biol Chem.* 2003; 278:39076–39084.
13. Wang FZ, Fei HR, Lian LH, Wang JM, Qiu YY. Hepatitis B x-interacting protein induces HepG2 cell proliferation through activation of the phosphatidylinositol 3-kinase/Akt pathway. *Exp Biol Med (Maywood).* 2011; 236:62–69.
14. Cha MY, Kim CM, Park YM, Ryu WS. Hepatitis B virus X protein is essential for the activation of Wnt/beta-catenin signaling in hepatoma cells. *Hepatology.* 2004; 39:1683–1693.
15. Lee YI, Kang-Park S, Do SI, Lee YI. The Hepatitis B virus-X protein activates a phosphatidylinositol 3-kinase-dependent survival signaling cascade. *J Biol Chem.* 2001; 276:16969–16977.
16. Hann HW, Fu X, Myers RE, Hann RS, Wan S, Kim SH, Au N, Xing J, Yang H. Predictive value of alpha-fetoprotein in the long-term risk of developing hepatocellular carcinoma in patients with hepatitis B virus infection-results from a clinic-based longitudinal cohort. *Eur J Cancer.* 2012; 48:2319–2327.
17. Hung TM, Hu RH, Ho CM, Chiu YL, Lee JL, Jeng YM, Shih DT, Lee PH. Downregulation of alpha-fetoprotein expression by LHX4: a critical role in hepatocarcinogenesis. *Carcinogenesis.* 2011; 32:1815–1823.
18. Li M, Li H, Li C, Wang S, Jiang W, Liu Z, Zhou S, Liu X, McNutt MA, Li G. Alpha-fetoprotein: A new member of intracellular signal molecules in regulation of the PI3K/AKT signaling in human hepatoma cell lines. *Int J Cancer.* 2011; 128:524–532.
19. Wang GL, Iakova P, Wilde M, Awad S, Timchenko NA. Liver tumors escape negative control of proliferation via PI3K/Akt-mediated block of C/EBP alpha growth inhibitory activity. *Genes Dev.* 2004; 18:912–925.
20. Wiedmann M, Tamaki S, Silberman R, de la Monte SM, Cousens L, Wands JR. Constitutive over-expression of the insulin receptor substrate-1 causes functional up-regulation of Fas receptor. *J Hepatol.* 2003; 38:803–810.
21. He X, Zhu Z, Johnson C, Stoops J, Eaker AE, Bowen W, DeFrances MC. PIK3IP1, a negative regulator of PI3K, suppresses the development of hepatocellular carcinoma. *Cancer Res.* 2008; 68:5591–5598.
22. Yang WJ, Chang CJ, Yeh SH, Lin WH, Wang SH, Tsai TF, Chen DS, Chen PJ. Hepatitis B virus X protein enhances the transcriptional activity of the androgen receptor through c-Src and glycogen synthase kinase-3 $\beta$  kinase pathways. *Hepatology.* 2009; 49:1515–1524.
23. Guichard C, Amaddeo G, Imbeaud S, Ladeiro Y, Pelletier L, Maad IB, Calderaro J, Bioulac-Sage P,



- Letexier M, Degos F, Clément B, Balabaud C, Chevet E, Laurent A, Couchy G, Letouzé E, Calvo F, Zucman-Rossi J. Integrated analysis of somatic mutations and focal copy-number changes identifies key genes and pathways in hepatocellular carcinoma. *Nat Genet.* 2012; 44:694–698.
24. Ghasemi R, Ghaffari SH, Momeny M, Pirouzpanah S, Yousefi M, Malehmir M, Alimoghaddam K, Ghavamzadeh A. Multitargeting and antimetastatic potentials of silibinin in human HepG-2 and PLC/PRF/5 hepatoma cells. *Nutr Cancer.* 2013; 65:590–599.
  25. Suzuki K, Oneyama C, Kimura H, Tajima S, Okada M. Down-regulation of the tumor suppressor C-terminal Src kinase (Csk)-binding protein (Cbp)/PAG1 is mediated by epigenetic histone modifications via the mitogen-activated protein kinase (MAPK)/phosphatidylinositol 3-kinase (PI3K) pathway. *J Biol Chem.* 2011; 286:15698–15706.
  26. Liang Z, Brooks J, Willard M, Liang K, Yoon Y, Kang S, Shim H. CXCR4/CXCL12 axis promotes VEGF-mediated tumor angiogenesis through Akt signaling pathway. *Biochem Biophys Res Commun.* 2007; 359:716–722.
  27. Yasinska IM, Gibbs BF, Lall GS, Sumbayev VV. The HIF-1 transcription complex is essential for translational control of myeloid hematopoietic cell function by maintaining mTOR phosphorylation. *Cell Mol Life Sci.* 2014; 71:699–710.
  28. Majumder PK, Febbo PG, Bikoff R, Berger R, Xue Q, McMahon LM, Manola J, Brugarolas J, McDonnell TJ, Golub TR, Loda M, Lane HA, Sellers WR. mTOR inhibition reverses Akt-dependent prostate intraepithelial neoplasia through regulation of apoptotic and HIF-1-dependent pathways. *Nat Med.* 2004; 10:594–601.
  29. Bernardi R, Guernah I, Jin D, Grisendi S, Alimonti A, Teruya-Feldstein J, et al. PML inhibits HIF-1 $\alpha$  translation and neoangiogenesis through repression of mTOR. *Nature.* 2006; 442:779–785.
  30. Li MS, Li PF, Yang FY, He SP, Du GG, Li G. The intracellular mechanism of alpha-fetoprotein promoting the proliferation of NIH 3T3 cells. *Cell Res.* 2002; 12:151–156.
  31. Li M, Zhu M, Li W, Lu Y, Xie X, Wu Y, Zheng S. Alpha-fetoprotein receptor as an early indicator of HBx-driven hepatocarcinogenesis and its applications in tracing cancer cell metastasis. *Cancer Lett.* 2013; 330:170–180.
  32. Li M, Xie X, Fu S, Zhu M, Li G. Alpha-fetoprotein up-regulated the expression of c-Src in hepatoma cells is PTEN/AKT signaling pathway dependent or independent. *J Clin Oncol.* 2010; 28:e21061.
  33. Chung TW, Lee YC, Ko JH, Kim CH. Hepatitis B virus X protein modulates the expression of PTEN by inhibiting the function of p53, a transcriptional activator in liver cells. *Cancer Res.* 2003; 63:3453–3458.
  34. Arima T, Nakao K, Nakata K, Ishikawa H, Ichikawa T, Hamasaki K, Ishii N, Eguchi K. Transactivation of human alpha-fetoprotein gene by X-gene product of hepatitis B virus in human hepatoma cells. *Int J Mol Med.* 2002; 9:397–400.
  35. Li M, Li H, Li C, Guo L, Liu H, Zhou S, Liu X, Chen Z, Shi S, Wei J, McNutt MA, Li G. Cytoplasmic alpha-fetoprotein functions as a co-repressor in RA-RAR signaling to promote the growth of human hepatoma Bel 7402 cells. *Cancer Lett.* 2009; 285:190–199.
  36. Li M, Li H, Li C, Zhou S, Guo L, Liu H, Jiang W, Liu X, Li P, McNutt MA, Li G. Alpha fetoprotein is a novel protein-binding partner for caspase-3 and blocks the apoptotic signaling pathway in human hepatoma cells. *Int J Cancer.* 2009; 124:2845–2854.
  37. Shang Y, Hu X, DiRenzo J, Lazar MA, Brown M. Cofactor dynamics and sufficiency in estrogen receptor-regulated transcription. *Cell.* 2000; 103:843–852.
  38. Choi Y, Zhang J, Murga C, Yu H, Koller E, Monia BP, Gutkind JS, Li W. PTEN, but not SHIP and SHIP2, suppresses the PI3K/Akt pathway and induces growth inhibition and apoptosis of myeloma cells. *Oncogene.* 2002; 21:5289–5300.
  39. Xu Z, Stokoe D, Kane LP, Weiss A. The inducible expression of the tumor suppressor gene PTEN promotes apoptosis and decreases cell size by inhibiting the PI3K/Akt pathway in Jurkat T cells. *Cell Growth Differ.* 2002; 13:285–296.
  40. Kang-Park S, Im JH, Lee JH, Lee YI. PTEN modulates hepatitis B virus-X protein induced survival signaling in Chang liver cells. *Virus Res.* 2006; 122:53–60.
  41. Liu LP, Ho RL, Chen GG, Lai PB. Sorafenib inhibits hypoxia-inducible factor-1 $\alpha$  synthesis: implications for antiangiogenic activity in hepatocellular carcinoma. *Clin Cancer Res.* 2012; 18:5662–5671.
  42. Otsuka M, Aizaki H, Kato N, Suzuki T, Miyamura T, Omata M, Seki N. Differential cellular gene expression induced by hepatitis B and C viruses. *Biochem Biophys Res Commun.* 2003; 300:443–447.
  43. Zhou MX, Watabe M, Watabe K. The X-gene of human hepatitis B virus transactivates the c-jun and alpha-fetoprotein genes. *Arch Virol.* 1994; 134:369–378.
  44. Ball D, Rose E, Alpert E. Alpha-fetoprotein levels in normal adults. *Am J Med Sci.* 1992; 303:157–159.
  45. Tilghman SM, Belayew A. Transcriptional control of the murine albumin/alpha-fetoprotein locus during development. *Proc Natl Acad Sci U S A.* 1982; 79:5254–5257.
  46. Shih WL, Kuo ML, Chuang SE, Cheng AL, Doong SL. Hepatitis B virus X protein activates a survival signaling by linking SRC to phosphatidylinositol 3-kinase. *J Biol Chem.* 2003; 278:31807–31813.
  47. Wei W, Huang W, Pan Y, Zhu F, Wu J. Functional switch of viral protein HBx on cell apoptosis, transformation, and

- tumorigenesis in association with oncoprotein Ras. *Cancer Lett.* 2006; 244:119–128.
48. Zheng L, Gong W, Liang P, Huang X, You N, Han KQ, Li YM, Li J. Effects of AFP-activated PI3K/Akt signaling pathway on cell proliferation of liver cancer. *Tumour Biol.* 2014; 35:4095–4099
  49. Schimanski CC, Bahre R, Gockel I, Müller A, Frerichs K, Hörner V, Teufel A, Simiantonaki N, Biesterfeld S, Wehler T, Schuler M, Achenbach T, Junginger T, Galle PR, Moehler M. Dissemination of hepatocellular carcinoma is mediated via chemokine receptor CXCR4. *Br J Cancer.* 2006; 95:210–217.
  50. Wang ZS, Wu LQ, Yi X, Geng C, Li YJ, Yao RY. Connexin-43 can delay early recurrence and metastasis in patients with hepatitis B-related hepatocellular carcinoma and low serum alpha-fetoprotein after radical hepatectomy. *BMC Cancer.* 2013; 13:306.
